# Supplementary material
Source: Springer Nature journal article supplement (https://www.springermedizin.de/resource/supplementary/12985_2010_1094_MOESM5_ESM.pdf/9609128)

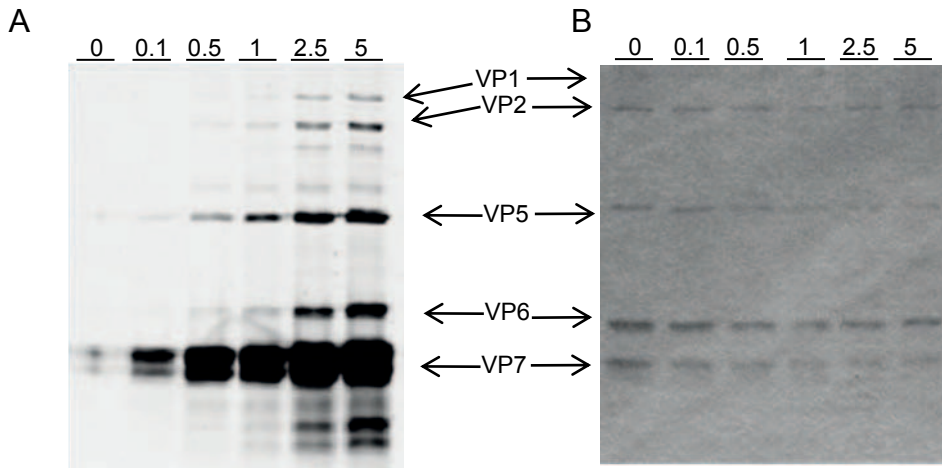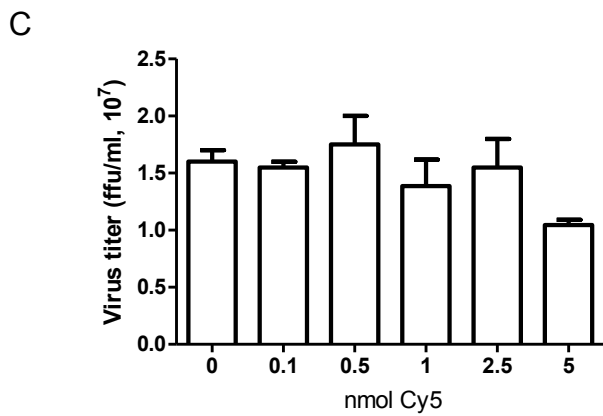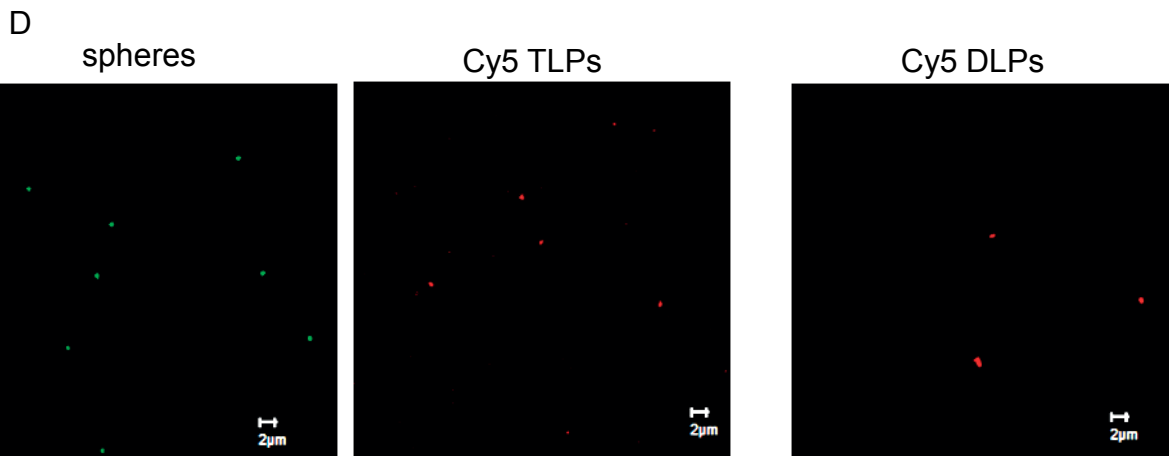

Supplement: MOESM5 [file 9609128]
